# Supplementary material
Source: publisher figshare collection journal article supplement (https://tandf.figshare.com/ndownloader/files/31958265)
Supplement: Supplementary file 1 [file 31958265]

**SUPPLEMENTAL INFORMATION**

**TABLE S1**

**Organic carbon isotopic values (*δ*13Corg ) for macrophytes (by species and segment), and organic carbon isotope (*δ*13Corg ) and nitrogen isotope values (*δ*15N) for related surface sediments in corresponding sample sites from EVV Upper lake.**

| **Site** | **Species** | **Section** | ***δ*13Corg plant**  **(‰)** | ***δ*13Corg sediment (‰)** | ***δ*15N sediment (‰)** |
| --- | --- | --- | --- | --- | --- |
| **1** | ***Hippuris*** | **Emergent** | **-27.3** | **-29.5** | **-0.47** |
|  |  | **Submergent** | **-33.2** |  |  |
|  |  | **Root** | **-29.2** |  |  |
| **2** | ***Warnstorfia*** |  | **-29.9** | **-26.9** | **-0.16** |
| **3** | ***Eriophorum*** | **Emergent** | **-28.7** | **-29.8** | **-0.18** |
|  |  | **Submergent** | **-29.1** |  |  |
|  |  | **Root** | **-29.6** |  |  |
|  | ***Warnstorfia*** |  | **-31.1** |  |  |
| **4** | ***Hippuris*** | **Emergent** | **-27.4** | **-28.9** | **-0.12** |
|  |  | **Submergent** | **-29.5** |  |  |
|  |  | **Root** | **-28.6** |  |  |
|  | ***Warnstorfia*** |  | **-33.0** |  |  |
| **5** | ***Warnstorfia*** |  | **-32.0** | **-29.3** | **0.46** |
| **6** | ***Hippuris*** | **Emergent** | **-27.3** | **-30.2** | **0.04** |
|  |  | **Submergent** | **-29.0** |  |  |
|  |  | **Root** | **-29.6** |  |  |
|  | ***Warnstorfia*** |  | **-31.5** |  |  |
| **7** | ***Hippuris*** | **Emergent** | **-27.7** | **-30.8** | **0.15** |
|  |  | **Submergent** | **-27.9** |  |  |
|  |  | **Root** | **-28.8** |  |  |
|  | ***Warnstorfia*** |  | **-33.9** |  |  |
| **8** | ***Eriophorum*** | **Emergent** | **-28.3** | **-29.3** | **0.5** |
|  |  | **Submergent** | **-27.4** |  |  |
|  |  | **Root** | **-27.9** |  |  |
|  | ***Warnstorfia*** |  | **-31.1** |  |  |
| **9** | ***Warnstorfia*** |  | **-33.2** | **-29.7** | **0.22** |
| **10** | ***Eriophorum*** | **Emergent** | **-27.1** | **-30.3** | **1.33** |
|  |  | **Submergent** | **-27.7** |  |  |
|  |  | **Root** | **-27.5** |  |  |

**TABLE S2**

**Surface sediment organic carbon isotopic values (*δ*13Corg ), percent organic carbon, and C to N ratio in corresponding sample sites from EVV Upper lake.**

| **Site** | ***δ*13Corg**  **(*‰*)** | **% C** | **C:N** |
| --- | --- | --- | --- |
| **1** | **-29.52** | **11.96** | **12.37** |
| **2** | **-26.88** | **2.73** | **8.53** |
| **3** | **-29.80** | **8.92** | **10.96** |
| **4** | **-28.87** | **4.04** | **10.65** |
| **5** | **-29.33** | **14.43** | **11.59** |
| **6** | **-30.23** | **19.49** | **12.31** |
| **7** | **-30.81** | **16.37** | **11.25** |
| **8** | **-29.25** | **2.57** | **9.92** |
| **9** | **-29.74** | **5.61** | **10.89** |
| **10** | **-30.31** | **17.33** | **10.72** |
|  |  |  |  |
